# Supplementary material for: New URJC-1 Material with Remarkable Stability and Acid-Base Catalytic Properties
Source: MDPI journal article supplement (doi:10.3390/polym8020044), 2016-02-05

# Supplementary Materials: New URJC-1 Material with Remarkable Stability and Acid-Base Catalytic Properties

Pedro Leo, Fernando Martínez, Guillermo Calleja, David Briones, Lukasz Wojtas and Gisela Orcajo

## S1. Crystallographic Data of URJC-1 Material

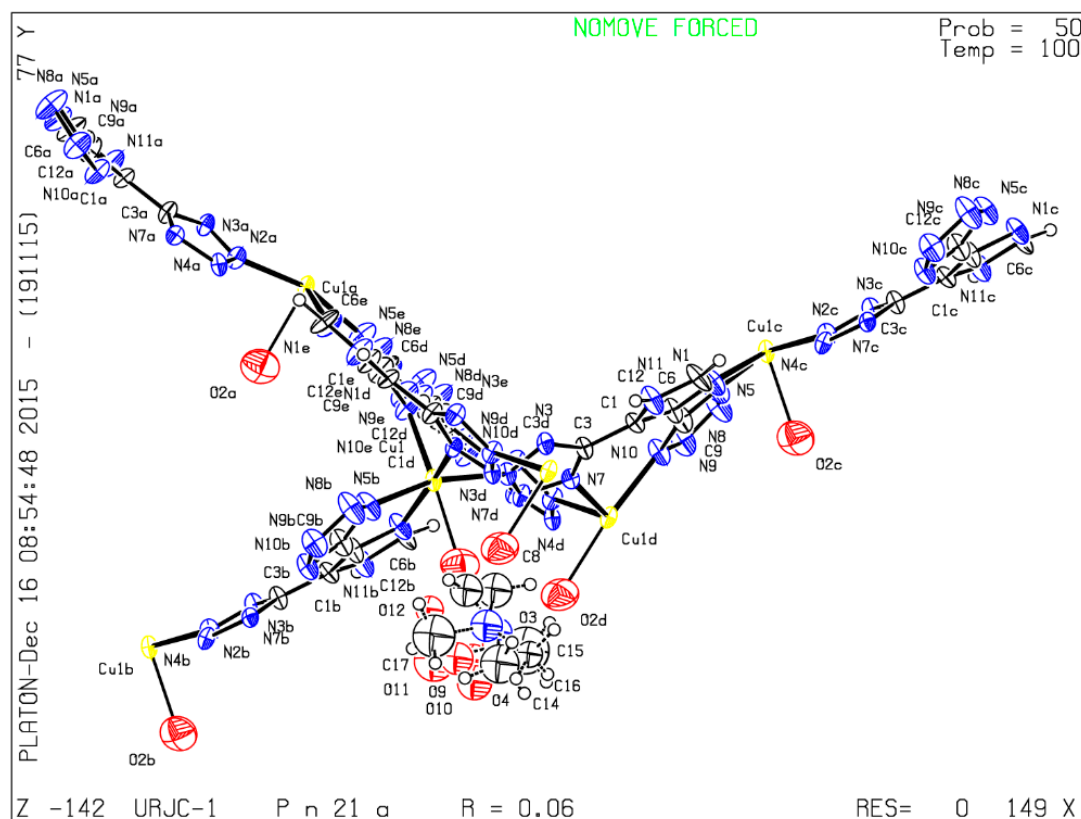

Figure S1. URJC-1 structure from checkcif file.

**Table S1.** Crystal data and structure refinement for compound URJC-1.

|                                                              |                                                                              |
|--------------------------------------------------------------|------------------------------------------------------------------------------|
| Identification code                                          | URJC-1                                                                       |
| Empirical formula                                            | C <sub>6.5</sub> H <sub>5.5</sub> CuN <sub>10.5</sub> O <sub>1.25</sub>      |
| Formula weight                                               | 314.25                                                                       |
| Temperature/K                                                | 100.0                                                                        |
| Crystal system                                               | orthorhombic                                                                 |
| Space group                                                  | Pn2 <sub>1</sub> a                                                           |
| <i>a</i> /Å                                                  | 8.6577(6)                                                                    |
| <i>b</i> /Å                                                  | 9.0478(9)                                                                    |
| <i>c</i> /Å                                                  | 14.9973(11)                                                                  |
| $\alpha$ /°                                                  | 90                                                                           |
| $\beta$ /°                                                   | 90                                                                           |
| $\gamma$ /°                                                  | 90                                                                           |
| Volume/Å <sup>3</sup>                                        | 1,174.79(17)                                                                 |
| <i>Z</i>                                                     | 4                                                                            |
| $\rho_{\text{calc}}/\text{g}/\text{cm}^3$                    | 1.777                                                                        |
| $\mu/\text{mm}^{-1}$                                         | 2.811                                                                        |
| <i>F</i> (000)                                               | 628.0                                                                        |
| Crystal size/mm <sup>3</sup>                                 | 0.02 × 0.02 × 0.02                                                           |
| Radiation                                                    | CuK $\alpha$ ( $\lambda$ = 1.54178)                                          |
| 2 $\theta$ range for data collection/°                       | 11.802 to 136.714                                                            |
| Index ranges                                                 | −10 ≤ <i>h</i> ≤ 9, −10 ≤ <i>k</i> ≤ 10, −17 ≤ <i>l</i> ≤ 17                 |
| Reflections collected                                        | 7090                                                                         |
| Independent reflections                                      | 1999 [ <i>R</i> <sub>int</sub> = 0.1146, <i>R</i> <sub>sigma</sub> = 0.0795] |
| Data/restraints/parameters                                   | 1,999/101/210                                                                |
| Goodness-of-fit on <i>F</i> <sup>2</sup>                     | 1.127                                                                        |
| Final <i>R</i> indexes [ <i>I</i> ≥ 2 $\sigma$ ( <i>I</i> )] | <i>R</i> <sub>1</sub> = 0.0619, <i>wR</i> <sub>2</sub> = 0.1311              |
| Final <i>R</i> indexes [all data]                            | <i>R</i> <sub>1</sub> = 0.0801, <i>wR</i> <sub>2</sub> = 0.1399              |
| Largest diff. peak/hole/e Å <sup>−3</sup>                    | 0.39/−0.46                                                                   |
| Flack parameter                                              | 0.20(7)                                                                      |

## S2. Structural Details of URJC-1 Structure

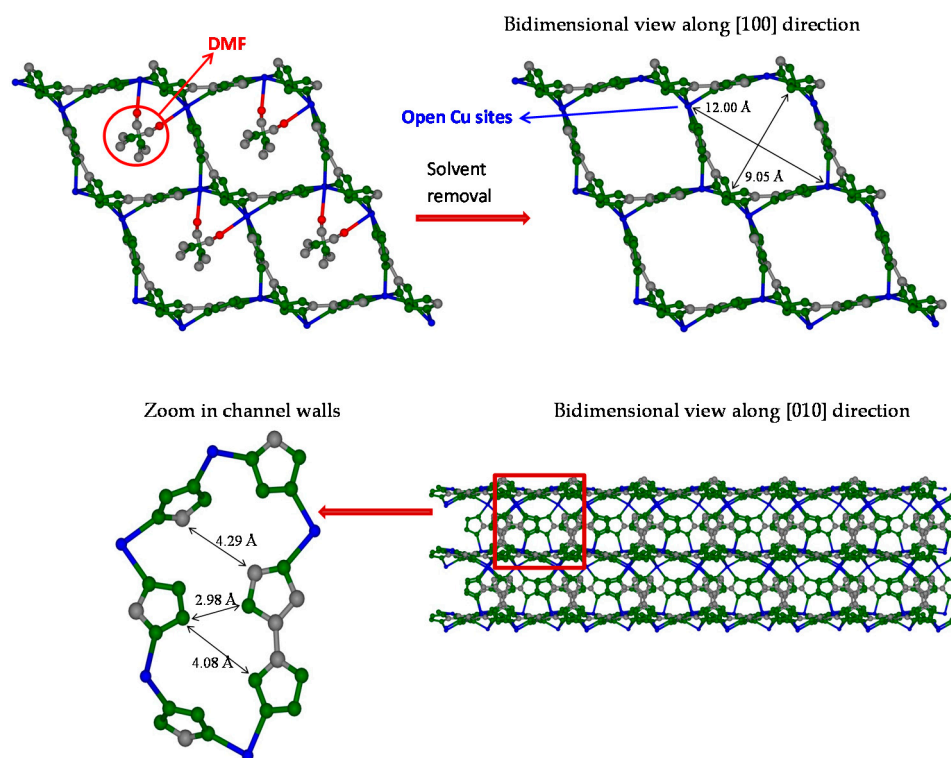

Figure S2. Structural details of URJC-1's pore system.

## S3. Reaction Turnover Frequency Parameters (TOF)

Table S2. TOF parameter of different catalysts after 1 h of anisole acylation reaction.

| Catalyst                 | TOF (h <sup>-1</sup> ) | Active sites <sup>a</sup><br>(mmol/mg) | Si/Al | Reference |
|--------------------------|------------------------|----------------------------------------|-------|-----------|
| URJC-1                   | 47                     | 0.0038                                 | -     | This work |
| HKUST-1 <sup>b</sup>     | 24                     | 0.0050                                 | -     | This work |
| ZSM-5 <sup>b</sup>       | 76                     | 0.00053                                | 30    | This work |
| BEA ZEOLITE <sup>b</sup> | 110                    | 0.00083                                | 19    | This work |
| ZSM-5 <sup>c</sup>       | 26                     | 0.00053                                | 31    | [30]      |

<sup>a</sup> Aluminum atoms in the case of zeolites, and copper atoms in the case of URJC-1 and HKUST-1 MOF materials; <sup>b</sup> HKUST-1, ZSM-5, and BETA were purchased to Sigma-Aldrich Química S.L., Sud Chemie Iberia S.L. and Zeolyst International, respectively; <sup>c</sup> Synthesized by the authors of reference [30].

Table S3. TOF parameter of different catalysts after 1 h of Knoevenagel reaction.

| Catalyst               | TOF (h <sup>-1</sup> ) | Active sites <sup>a</sup><br>(mmol/mg) |
|------------------------|------------------------|----------------------------------------|
| URJC-1                 | 4                      | 0.0038                                 |
| HKUST-1                | 19                     | 0.0099                                 |
| UiO-66-NH <sub>2</sub> | 83                     | 0.00061                                |

<sup>a</sup> Basic non-coordinated nitrogen atoms from tetrazole rings for URJC-1; basic oxygen atoms from the carboxylate ligand for HKUST-1; basic amino groups for UiO-66-NH<sub>2</sub>.

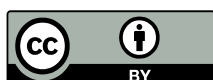

Supplement: s1 [file s1]
